# Supplementary material for: Lung Cancer and Occupation in a Population-based Case-Control Study
Source: PubMed Central journal article supplement — Am J Epidemiol. 2010 Jan 4;171(3):323–33. doi: 10.1093/aje/kwp391 (PMC2808498; doi:10.1093/aje/kwp391), 2010-01-04
Supplement: kwp391_1.pdf [file kwp391_1.pdf]

Web Table 1. Lung Cancer Risk for Selected<sup>a</sup> Industries Among Subjects Never Exposed to List A or B Occupations (Men: 1,015 Cases and 1,171 Controls; Women: 379 Cases and 471 Controls) in the EAGLE Study, Lombardy, Italy, 2002-05.

| ISIC Code/Industry                                                                                      | Men   |          |                       |                             | Women |          |                       |                             |
|---------------------------------------------------------------------------------------------------------|-------|----------|-----------------------|-----------------------------|-------|----------|-----------------------|-----------------------------|
|                                                                                                         | Cases | Controls | OR<br>(95% CI)        | OR <sub>E</sub><br>(95% CI) | Cases | Controls | OR<br>(95% CI)        | OR <sub>E</sub><br>(95% CI) |
| 1/Agriculture, hunting, forestry and fishing                                                            | 77    | 86       | 0.67<br>(0.45, 1.01)  | 0.57<br>(0.37, 0.86)        | 9     | 16       | 0.96<br>(0.38, 2.46)  | 0.92<br>(0.35, 2.38)        |
| 1110/Agricultural and livestock production                                                              | 73    | 81       | 0.70<br>(0.46, 1.05)  | 0.58<br>(0.38, 0.90)        | 9     | 16       | 0.96<br>(0.38, 2.46)  | 0.92<br>(0.35, 2.38)        |
| 3117/Manufacture of bakery products                                                                     | 37    | 33       | 0.95<br>(0.52, 1.76)  | 0.84<br>(0.45, 1.55)        | 14    | 12       | 2.10<br>(0.84, 5.24)  | 2.04<br>(0.81, 5.11)        |
| 321/Manufacture of textiles                                                                             | 26    | 40       | 1.05<br>(0.58, 1.90)  | 1.06<br>(0.58, 1.93)        | 13    | 30       | 0.47<br>(0.21, 1.05)  | 0.44<br>(0.19, 0.99)        |
| 3211/Spinning, weaving and finishing textiles                                                           | 13    | 23       | 0.92<br>(0.41, 2.04)  | 0.89<br>(0.40, 2.00)        | 5     | 24       | 0.25<br>(0.08, 0.73)  | 0.22<br>(0.07, 0.67)        |
| 3411/Manufacture of pulp, paper and paperboard                                                          | 6     | 8        | 3.53<br>(0.87, 14.42) | 3.65<br>(0.87, 15.26)       | 0     | 0        |                       |                             |
| 3412/Manufacture of containers and boxes of paper and paperboard                                        | 6     | 13       | 0.50<br>(0.16, 1.59)  | 0.47<br>(0.15, 1.48)        | 7     | 6        | 1.36<br>(0.36, 5.17)  | 1.24<br>(0.32, 4.72)        |
| 3521/Manufacture of paints, varnishes and lacquers                                                      | 6     | 11       | 0.37<br>(0.12, 1.18)  | 0.35<br>(0.11, 1.13)        | 2     | 2        |                       |                             |
| 38/Manufacture of fabricated metal products, machinery and equipment                                    | 370   | 407      | 1.41<br>(1.11, 1.78)  | 1.39<br>(1.10, 1.76)        | 62    | 70       | 1.31<br>(0.83, 2.06)  | 1.28<br>(0.82, 2.02)        |
| 381/Manufacture of fabricated metal products except machinery and equipment                             | 113   | 102      | 1.77<br>(1.22, 2.56)  | 1.65<br>(1.13, 2.40)        | 14    | 13       | 1.62<br>(0.67, 3.90)  | 1.62<br>(0.68, 3.90)        |
| 3811/Manufacture of cutlery, hand tools and general hardware                                            | 11    | 8        | 2.47<br>(0.70, 8.69)  | 2.07<br>(0.59, 7.27)        | 1     | 2        |                       |                             |
| 3819/Manufacture of fabricated metal products except machinery and equipment NEC                        | 69    | 64       | 1.53<br>(0.97, 2.41)  | 1.47<br>(0.93, 2.32)        | 10    | 6        | 2.57<br>(0.81, 8.13)  | 2.59<br>(0.82, 8.20)        |
| 3821/Manufacture of engines and turbines                                                                | 10    | 6        | 3.29<br>(0.93, 11.61) | 3.53<br>(1.00, 12.42)       | 1     | 1        |                       |                             |
| 3831/Manufacture of electrical industrial machinery and apparatus                                       | 29    | 26       | 2.04<br>(1.04, 3.97)  | 2.12<br>(1.09, 4.14)        | 3     | 5        |                       |                             |
| 384/Manufacture of transport equipment                                                                  | 46    | 32       | 2.02<br>(1.14, 3.61)  | 2.10<br>(1.17, 3.74)        | 6     | 4        |                       |                             |
| 385/Manufacture of professional/scientific/measuring/controlling equipment NEC, and photo/optical goods | 26    | 29       | 1.93<br>(0.94, 3.93)  | 2.04<br>(1.01, 4.13)        | 7     | 5        | 1.63<br>(0.38, 7.06)  | 1.59<br>(0.37, 6.88)        |
| 3852/Manufacture of photographic and optical goods                                                      | 9     | 8        | 2.33<br>(0.65, 8.34)  | 2.54<br>(0.72, 8.92)        | 2     | 3        |                       |                             |
| 390/Other manufacturing industries                                                                      | 22    | 12       | 2.27<br>(0.94, 5.50)  | 2.26<br>(0.93, 5.44)        | 10    | 6        | 4.03<br>(1.26, 12.93) | 3.94<br>(1.22, 12.71)       |

| ISIC Code/Industry                                           | Men   |          |                       |                             | Women |          |                      |                             |
|--------------------------------------------------------------|-------|----------|-----------------------|-----------------------------|-------|----------|----------------------|-----------------------------|
|                                                              | Cases | Controls | OR<br>(95% CI)        | OR <sub>E</sub><br>(95% CI) | Cases | Controls | OR<br>(95% CI)       | OR <sub>E</sub><br>(95% CI) |
| 3901/Manufacture of jewellery and related articles           | 15    | 6        | 2.97<br>(0.85, 10.38) | 2.87<br>(0.83, 9.95)        | 4     | 3        |                      |                             |
| 6100/Wholesale trade                                         | 37    | 86       | 0.48<br>(0.29, 0.77)  | 0.49<br>(0.30, 0.80)        | 13    | 29       | 0.53<br>(0.25, 1.14) | 0.56<br>(0.26, 1.22)        |
| 6200/Retail trade                                            | 155   | 149      | 1.14<br>(0.84, 1.54)  | 1.12<br>(0.82, 1.52)        | 50    | 73       | 0.61<br>(0.38, 0.98) | 0.60<br>(0.37, 0.98)        |
| 71/ Transport and storage                                    | 88    | 67       | 1.70<br>(1.12, 2.60)  | 1.67<br>(1.09, 2.54)        | 6     | 12       | 0.52<br>(0.16, 1.75) | 0.55<br>(0.16, 1.82)        |
| 713/Air transport                                            | 8     | 5        | 2.64<br>(0.66, 10.54) | 2.94<br>(0.73, 11.79)       | 1     | 1        |                      |                             |
| 7191/Services incidental to transport                        | 11    | 10       | 2.80<br>(0.90, 8.68)  | 2.99<br>(0.97, 9.25)        | 3     | 2        |                      |                             |
| 9/Community, social and personal services                    | 275   | 427      | 0.74<br>(0.59, 0.94)  | 0.75<br>(0.59, 0.95)        | 126   | 161      | 0.83<br>(0.59, 1.19) | 0.86<br>(0.60, 1.23)        |
| 9100/Public administration and defense                       | 99    | 221      | 0.52<br>(0.38, 0.71)  | 0.52<br>(0.38, 0.71)        | 13    | 19       | 1.00<br>(0.42, 2.37) | 1.07<br>(0.45, 2.56)        |
| 9310/Education services                                      | 36    | 69       | 0.81<br>(0.48, 1.38)  | 0.90<br>(0.53, 1.53)        | 31    | 68       | 0.55<br>(0.33, 0.94) | 0.58<br>(0.33, 1.02)        |
| 941/Motion picture and other entertainment services          | 24    | 21       | 1.76<br>(0.82, 3.77)  | 1.78<br>(0.83, 3.82)        | 5     | 8        | 0.48<br>(0.12, 1.93) | 0.49<br>(0.12, 1.98)        |
| 9414/ Theatrical producers and entertainment services        | 7     | 7        | 3.12<br>(0.77, 12.59) | 3.07<br>(0.77, 12.23)       | 1     | 0        |                      |                             |
| 9512/Electrical repair shops                                 | 13    | 10       | 2.09<br>(0.74, 5.93)  | 2.08<br>(0.73, 5.87)        | 0     | 1        |                      |                             |
| 9513/Repair of motor vehicles and motorcycles                | 5     | 13       | 0.43<br>(0.13, 1.42)  | 0.38<br>(0.12, 1.25)        | 0     | 0        |                      |                             |
| 9530/Domestic services                                       | 10    | 6        | 2.56<br>(0.68, 9.57)  | 2.37<br>(0.64, 8.81)        | 31    | 36       | 0.82<br>(0.44, 1.55) | 0.73<br>(0.38, 1.41)        |
| 9591/Barber and beauty shops                                 | 12    | 10       | 1.77<br>(0.56, 5.59)  | 1.63<br>(0.52, 5.14)        | 12    | 5        | 2.22<br>(0.64, 7.79) | 2.00<br>(0.57, 7.04)        |
| 9592/ Photographic studios, including commercial photography | 7     | 8        | 2.20<br>(0.55, 8.82)  | 2.29<br>(0.58, 9.08)        | 0     | 5        |                      |                             |

Abbreviations: CI, confidence interval; ISIC, International Standard Industrial Classification, 1971; NEC, not elsewhere classified; OR, odds ratio calculated with logistic regression models, adjusted for area, age, smoking, and number of jobs; OR<sub>E</sub>: OR adjusted also for education.

<sup>a</sup>Industries with at least 5 cases and 5 controls exposed in one of the genders and ( $P$  value  $\leq 0.05$  or OR  $\geq 2.00$  or  $\leq 0.50$ ).

Web Table 2. Lung Cancer Risk in Selected<sup>a</sup> Jobs Among Subjects Never Exposed to List A or B Occupations (Men: 1,015 Cases and 1,171 Controls; Women: 379 Cases and 471 Controls) in the EAGLE Study, Lombardy, Italy, 2002-05.

| ISCO Code/Job                                                          | Men   |          |                       |                             | Women |          |                      |                             |
|------------------------------------------------------------------------|-------|----------|-----------------------|-----------------------------|-------|----------|----------------------|-----------------------------|
|                                                                        | Cases | Controls | OR<br>(95% CI)        | OR <sub>E</sub><br>(95% CI) | Cases | Controls | OR<br>(95% CI)       | OR <sub>E</sub><br>(95% CI) |
| 033/Civil engineering technicians                                      | 14    | 23       | 0.46<br>(0.20, 1.05)  | 0.54<br>(0.23, 1.22)        | 0     | 0        |                      |                             |
| 03340/ Clerks of works                                                 | 12    | 20       | 0.46<br>(0.18, 1.13)  | 0.53<br>(0.22, 1.33)        | 0     | 0        |                      |                             |
| 061/Farmers                                                            | 7     | 26       | 0.45<br>(0.15, 1.32)  | 0.51<br>(0.18, 1.50)        | 2     | 2        |                      |                             |
| 084/Statistical and mathematical technicians                           | 5     | 17       | 0.44<br>(0.14, 1.42)  | 0.48<br>(0.15, 1.54)        | 0     | 1        |                      |                             |
| 08420/Computer programmers                                             | 5     | 16       | 0.45<br>(0.14, 1.47)  | 0.49<br>(0.15, 1.58)        | 0     | 1        |                      |                             |
| 12/Jurists                                                             | 7     | 13       | 0.45<br>(0.14, 1.44)  | 0.53<br>(0.15, 1.86)        | 1     | 1        |                      |                             |
| 12110/Lawyers                                                          | 6     | 12       | 0.47<br>(0.13, 1.64)  | 0.53<br>(0.15, 1.86)        | 1     | 1        |                      |                             |
| 132/Secondary education teachers                                       | 3     | 19       |                       |                             | 7     | 23       | 0.38<br>(0.14, 1.02) | 0.42<br>(0.15, 1.15)        |
| 13990/Other teachers                                                   | 10    | 7        | 2.56<br>(0.75, 8.73)  | 2.85<br>(0.83, 9.80)        | 11    | 1        |                      |                             |
| 16/Sculptors, painters, photographers, and related creative artists    | 20    | 15       | 2.22<br>(0.98, 5.03)  | 2.35<br>(1.03, 5.33)        | 3     | 9        |                      |                             |
| 163/Photographers and cameramen                                        | 9     | 5        | 3.05<br>(0.87, 10.70) | 3.26<br>(0.93, 11.42)       | 0     | 2        |                      |                             |
| 16310/Photographers, general                                           | 7     | 5        | 2.60<br>(0.70, 9.68)  | 2.78<br>(0.75, 10.35)       | 0     | 2        |                      |                             |
| 19/Professional, technical/related workers NEC                         | 18    | 18       | 1.49<br>(0.64, 3.51)  | 1.63<br>(0.69, 3.85)        | 7     | 8        | 1.94<br>(0.60, 6.26) | 2.18<br>(0.66, 7.21)        |
| 33/Bookkeepers, cashiers and related workers                           | 25    | 50       | 0.64<br>(0.36, 1.16)  | 0.70<br>(0.39, 1.26)        | 11    | 26       | 0.42<br>(0.17, 1.02) | 0.44<br>(0.18, 1.06)        |
| 331/Bookkeepers and cashiers                                           | 25    | 45       | 0.69<br>(0.38, 1.25)  | 0.75<br>(0.41, 1.37)        | 11    | 26       | 0.42<br>(0.17, 1.02) | 0.44<br>(0.18, 1.06)        |
| 33110/Bookkeepers (general)                                            | 4     | 23       |                       |                             | 6     | 18       | 0.29<br>(0.09, 0.88) | 0.29<br>(0.09, 0.92)        |
| 38020/Telephone switchboard operators                                  | 2     | 3        |                       |                             | 6     | 5        | 2.51<br>(0.68, 9.34) | 2.58<br>(0.70, 9.56)        |
| 43/Technical salesmen, commercial travellers and manufacturers' agents | 76    | 125      | 0.65<br>(0.45, 0.94)  | 0.68<br>(0.47, 0.99)        | 3     | 5        |                      |                             |
| 431/Technical salesmen and service advisers                            | 13    | 27       | 0.45                  | 0.49                        | 0     | 0        |                      |                             |

| ISCO Code/Job                                                                                  | Men   |          |                       |                             | Women |          |                       |                             |
|------------------------------------------------------------------------------------------------|-------|----------|-----------------------|-----------------------------|-------|----------|-----------------------|-----------------------------|
|                                                                                                | Cases | Controls | OR<br>(95% CI)        | OR <sub>E</sub><br>(95% CI) | Cases | Controls | OR<br>(95% CI)        | OR <sub>E</sub><br>(95% CI) |
| 45190/Other salesmen, shop assistants and demonstrators                                        | 5     | 7        | 0.30<br>(0.07, 1.32)  | 0.33<br>(0.07, 1.46)        | 0     | 1        |                       |                             |
| 54020/Housemaids                                                                               | 2     | 3        |                       |                             | 5     | 8        | 0.22<br>(0.05, 1.03)  | 0.20<br>(0.04, 0.95)        |
| 54035/Nursemaids                                                                               | 0     | 0        |                       |                             | 10    | 8        | 2.05<br>(0.70, 6.00)  | 1.97<br>(0.67, 5.80)        |
| 570/Hairdressers, barbers, beauticians and related workers                                     | 12    | 10       | 1.77<br>(0.56, 5.59)  | 1.63<br>(0.52, 5.14)        | 13    | 5        | 2.22<br>(0.64, 7.79)  | 2.00<br>(0.57, 7.04)        |
| 7/8/9/Production and related workers, transport equipment operators and labourers              | 587   | 608      | 1.18<br>(0.94, 1.48)  | 1.03<br>(0.80, 1.33)        | 120   | 145      | 1.51<br>(1.05, 2.16)  | 1.44<br>(0.96, 2.15)        |
| 70030/Supervisors and general foremen (metal processing)                                       | 7     | 14       | 0.46<br>(0.15, 1.39)  | 0.49<br>(0.16, 1.49)        | 1     | 0        |                       |                             |
| 72/Metal processors                                                                            | 43    | 14       | 3.35<br>(1.57, 7.15)  | 3.16<br>(1.48, 6.74)        | 2     | 0        |                       |                             |
| 77/Food and beverage processors                                                                | 42    | 34       | 1.08<br>(0.61, 1.93)  | 0.93<br>(0.51, 1.68)        | 11    | 7        | 2.86<br>(1.01, 8.10)  | 2.72<br>(0.96, 7.72)        |
| 79510/Hand and machine sewers                                                                  | 0     | 1        |                       |                             | 6     | 5        | 2.72<br>(0.73, 10.11) | 2.45<br>(0.65, 9.20)        |
| 803/Leather goods makers                                                                       | 8     | 12       | 0.46<br>(0.14, 1.51)  | 0.41<br>(0.12, 1.37)        | 1     | 6        |                       |                             |
| 832/Toolmakers, metal patternmakers and metal markers                                          | 12    | 7        | 2.50<br>(0.80, 7.83)  | 2.41<br>(0.78, 7.49)        | 0     | 1        |                       |                             |
| 83420/Lathe operator                                                                           | 34    | 75       | 0.55<br>(0.33, 0.92)  | 0.51<br>(0.30, 0.86)        | 0     | 0        |                       |                             |
| 84/Machinery fitters, machine assemblers and precision instruments makers except electrical    | 125   | 111      | 1.92<br>(1.35, 2.74)  | 1.86<br>(1.30, 2.65)        | 8     | 9        | 1.79<br>(0.63, 5.12)  | 1.68<br>(0.58, 4.83)        |
| 841/Machinery fitters, machine assemblers                                                      | 40    | 34       | 1.92<br>(1.07, 3.45)  | 1.75<br>(0.98, 3.17)        | 2     | 2        |                       |                             |
| 84105/Machinery fitters (general)                                                              | 15    | 11       | 2.00<br>(0.74, 5.40)  | 1.87<br>(0.70, 5.00)        | 0     | 1        |                       |                             |
| 843/Motor vehicle mechanics                                                                    | 9     | 5        | 3.00<br>(0.77, 11.70) | 3.07<br>(0.78, 12.14)       | 0     | 0        |                       |                             |
| 849/Machinery fitters, machine assemblers, precision instruments makers except electrical, NEC | 80    | 59       | 2.65<br>(1.67, 4.21)  | 2.56<br>(1.61, 4.08)        | 3     | 5        |                       |                             |
| 84910/Machinery mechanic (general)                                                             | 58    | 21       | 4.76<br>(2.45, 9.25)  | 4.68<br>(2.40, 9.16)        | 0     | 1        |                       |                             |
| 84945/Textile machinery mechanics                                                              | 5     | 5        | 2.12<br>(0.48, 9.39)  | 1.97<br>(0.44, 8.79)        | 1     | 0        |                       |                             |
| 85/Electrical fitters and related electrical and electronic                                    | 102   | 114      | 1.23                  | 1.22                        | 12    | 9        | 2.24                  | 2.04                        |

| ISCO Code/Job                            | Men   |          |                       |                             | Women |          |                |                             |
|------------------------------------------|-------|----------|-----------------------|-----------------------------|-------|----------|----------------|-----------------------------|
|                                          | Cases | Controls | OR<br>(95% CI)        | OR <sub>E</sub><br>(95% CI) | Cases | Controls | OR<br>(95% CI) | OR <sub>E</sub><br>(95% CI) |
| workers                                  |       |          | (0.87, 1.75)          | (0.85, 1.73)                |       |          | (0.80, 6.29)   | (0.72, 5.80)                |
| 85210/Electronic fitters, general        | 10    | 5        | 4.64<br>(1.24, 17.40) | 4.95<br>(1.32, 18.49)       | 1     | 0        |                |                             |
| 87310/Sheet-metal workers, general       | 9     | 8        | 2.16<br>(0.63, 7.38)  | 1.94<br>(0.57, 6.57)        | 1     | 2        |                |                             |
| 880/Jewellery and precious metal workers | 13    | 8        | 2.16<br>(0.62, 7.44)  | 2.04<br>(0.60, 6.92)        | 2     | 0        |                |                             |
| 98/Transport equipment operators         | 28    | 11       | 2.42<br>(1.04, 5.61)  | 2.18<br>(0.94, 5.05)        | 0     | 1        |                |                             |
| 985/Motor-vehicles drivers               | 25    | 10       | 2.57<br>(1.05, 6.28)  | 2.31<br>(0.94, 5.64)        | 0     | 0        |                |                             |
| 98530/Taxi drivers                       | 12    | 6        | 2.80<br>(0.82, 9.54)  | 2.48<br>(0.73, 8.43)        | 0     | 0        |                |                             |
| -/Armed forces                           | 42    | 137      | 0.36<br>(0.24, 0.56)  | 0.35<br>(0.23, 0.54)        | 0     | 0        |                |                             |

Abbreviations: CI, confidence intervals; ISCO, International Standard Classification of Occupations, 1968; NEC, not elsewhere classified; OR, odds ratio calculated with logistic regression models, adjusted for area, age, smoking, and number of jobs; OR<sub>E</sub>: OR adjusted also for education.

<sup>a</sup>Jobs with at least 5 cases and 5 controls exposed in one of the genders and ( $P$  value  $\leq 0.05$  or OR  $\geq 2.00$  or  $\leq 0.50$ )
